# Supplementary material for: Concordance between In Vitro and In Vivo Relative Toxic Potencies of Diesel Exhaust Particles from Different Biodiesel Blends
Source: MDPI journal article supplement (doi:10.3390/toxics12040290), 2024-04-16
Supplement: s1 [file s1]

## **SUPPLEMENTARY DATA DESCRIPTION**

Supplementary Table S1. Chemical analyses of B100 biodiesels.

Supplementary Table S2. Sample collection processes, analytical methodologies, and instrumentation used in the characterization of emissions

Supplementary Table S3. Primers used in the real-time PCR analysis of gene transcripts in the lung and heart tissues.

**Supplementary Table S1.** Analyses of Unblended Biodiesels (B100)

| Fuel Identification                | Method                   | Canola     | Soy    | Animal Tallow |
|------------------------------------|--------------------------|------------|--------|---------------|
| Density, kg/m <sup>3</sup> @ 15 °C | ASTM D4052               | 882.7      | 884.8  | 877.0         |
| Cetane No. D613                    | ASTM D613                | 52.30      | 54.70  | 66.70         |
| Carbon, %m                         | ASTM D5291               | 76.76      | 76.80  | 76.27         |
| Hydrogen, %m                       | ASTM D5291               | 12.02      | 11.44  | 11.66         |
| Viscosity @ 40 °C, (cSt)           | ASTM D445                | 4.382      | 4.242  | 4.737         |
| Sulphur, mg/kg                     | ASTM D5453               | 4.0        | 1.0    | 14.0          |
| Total Nitrogen, mg/kg              | ASTM D4629               | 9.600      | 2.570  | 75.580        |
| Ash, Sulphated, Mass %             | ASTM D874                | 0.000      | 0.001  | 0.002         |
| Cloud Point, °C                    | ASTM D2500               | -8         | 0      | 12            |
| Copper Corrosion                   | ASTM D130                | 1a         | 1a     | 1a            |
| Flash Point, °C                    | ASTM D93,<br>Procedure A | 136.0      | 130.0  | 167.0         |
| Carbon Residue, Mass %             | ASTM D4530               | 0.000      | 0.001  | 0.001         |
| Acid Number mg KOH/g               | ASTM D664                | 0.260      | 0.270  | 0.400         |
| Free Glycerine, mass %             | ASTM D6584               | <0.001     | <0.001 | 0.001         |
| Total Glycerine, mass %            | ASTM D6584               | 0.102      | 0.134  | 0.061         |
| Monoglycerides, mass %             | ASTM D6584               | 0.319      | 0.463  | 0.152         |
| Diglycerides, mass %               | ASTM D6584               | 0.095      | 0.081  | 0.120         |
| Triglycerides, mass %              | ASTM D6584               | 0.015      | 0.012  | 0.027         |
| Water and Sediment, Volume %       | ASTM D2709               | Not tested | 0.000  | 0.000         |
| Inductively Coupled Argon Plasma   | -                        | -          | -      | <0.001*       |
| Group I metals (Na + K), mg/kg     | EN 14107 modified        | <1         | -      | -             |
| Group II metals (Ca + Mg), mg/kg   | EN 14107 modified        | <1         | -      | -             |
| Phosphorus, mg/kg                  | EN 14107 modified        | <1         | -      | -             |
| Calcium (Ca), mg/kg                | ASDTM D5185 modified     | -          | <0.05  | <0.05         |

|                        |                         |   |        |        |
|------------------------|-------------------------|---|--------|--------|
| Potassium (K), mg/kg   | ASDTM D5185<br>modified | - | <0.05  | <0.05  |
| Magnesium (Mg), mg/kg  | ASDTM D5185<br>modified | - | <0.05  | <0.05  |
| Sodium (Na), mg/kg     | ASDTM D5185<br>modified | - | 3.5    | 1.0    |
| Phosphorus (P), mass % | ASDTM D5185<br>modified | - | <0.001 | <0.001 |
|                        | -                       |   |        |        |

---

**Supplementary Table S2.** Sample collection procedure, analytical methods, and instrumentation employed in the analyses of exhaust emissions during diesel exhaust particle sampling

| Compound                              | Analysis Method                          | Instrument                                           | Sample Collection     |
|---------------------------------------|------------------------------------------|------------------------------------------------------|-----------------------|
| Carbon Monoxide (CO)                  | Non-Dispersive Infrared Detection (NDIR) | HORIBA Model AIA-210 LE                              | Continuous Collection |
| Carbon Dioxide (CO <sub>2</sub> )     | Non-Dispersive Infrared Detection (NDIR) | HORIBA Model OPE-115                                 | Continuous Collection |
| Oxides of Nitrogen (NO <sub>x</sub> ) | Heated Chemiluminescence Detection       | California Analytical Instruments<br>Model 400-HCLD  | Continuous Collection |
| Total Hydrocarbons (THC)              | Heated Flame Ionization Detection (FID)  | California Analytical Instruments<br>Model 300M-HFID | Continuous Collection |
| Particulate Matter (PM)               | Gravimetric Procedure                    | Sartorius<br>M5P-00V001                              | 70mm Emfab Filters    |
| Fuel Consumption (FC)                 | Calculated                               | Based on Carbon Balance                              |                       |

**Supplementary Table S3.** Primers used in the real-time PCR analysis of gene transcripts in the lung and heart tissues.

| Primer<br>(Accession #)                                                                 | Primer Sequence                                                                       | Amplicon<br>Size (bp) |
|-----------------------------------------------------------------------------------------|---------------------------------------------------------------------------------------|-----------------------|
| TATA Binding Protein<br>TBP<br>(NM_013684.3)                                            | Sense (22-): ccaatgactcctatgacccta<br>Antisense (309-): cagccaagattcacggtagat         | 107                   |
| Oxyguanine glycosylase<br>OGG-1<br>(NM_010957.4)                                        | Sense (348-): gccacaagaactgggaaa<br>Antisense (422-): aggtcagcactgaacagcac            | 95                    |
| Interleukin 1 beta<br>IL-1 $\beta$<br>(NM_008361.3)                                     | Sense (86-): tgagcaccttctttcctca<br>Antisense (171-): ttgtctaattgggaacgtcacac         | 104                   |
| Interleukin 6<br>IL-6<br>(NM_031168.1)                                                  | Sense (327-): gctaccaaactggatataatcagga<br>Antisense (381-): ccaggtagctatggtactccagaa | 78                    |
| Endothelin<br>ET-1<br>(ENSMUST00000021796.6  <br>ENSMUSG00000021367.6)                  | Sense (465-): ggacatcatctgggtcaaca<br>Antisense (568-): tgggaagtaagtctttcaaggaa       | 121                   |
| Inducible nitric oxide synthase<br>iNOS<br>(NM_010927.3)                                | Sense (2573-): ccgatttagagtcttggtgaaag<br>Antisense (2646-): aatgtccaggaagtaggtgagg   | 95                    |
| Endothelial nitric synthase<br>eNOS<br>(ENSMUST00000030834.3  <br>ENSMUSG00000028978.5) | Sense (2066-): tgatacgctatgcgggcta<br>Antisense (2133-): cagccatgttgatacagagc         | 88                    |

---

|                                                                                                         |                                                                                           |     |
|---------------------------------------------------------------------------------------------------------|-------------------------------------------------------------------------------------------|-----|
| <p>Cytochrome P4502, family 1, subfamily A,<br/>polypeptide 1</p> <p>CYP1A1</p> <p>(NM_001136059.1)</p> | <p>Sense (1103-): ttctgtcctccgttacctg</p> <p>Antisense (1155): tctgtgatgtcccggatgt</p>    | 74  |
| <p>Metallothionein 2A</p> <p>MT2A</p> <p>(NM_008630.2)</p>                                              | <p>Sense (287-): ccgatctctcgtcgatcttc</p> <p>Antisense (375-): caggagcaggatccatcg</p>     | 107 |
| <p>Prostaglandin-endoperoxide synthase 2</p> <p>PTGS2</p> <p>(NM_011198.3)</p>                          | <p>Sense (100-): gtctctcaatgagtaccgcaaa</p> <p>Antisense (154-): ctgcagccatttccttctct</p> | 75  |
| <p>Heme oxygenase-1</p> <p>HO-1</p> <p>(NM_010442.2)</p>                                                | <p>Sense (250-): ggtcaggtgtccagagaagg</p> <p>Antisense (321-): gcttggtgcgctctatctcc</p>   | 91  |
| <p>Hypoxia-inducible factor</p> <p>HIF-3<math>\alpha</math></p> <p>(NM_016868.3)</p>                    | <p>Sense (86-): ttctgcaaggctgacaactc</p> <p>Antisense (171-): agcagcgaggagctagg</p>       | 104 |

---
